# Supplementary material for: Acridine-based macrocyclic fluorescent sensors: self-assembly behavior characterized by crystal structures and a tunable bathochromic-shift in emission induced by H2PO4−via adjusting the ring size and rigidity
Source: Royal Society of Chemistry journal article supplement (doi:10.1039/c3ob27500k), 2013-01-01
Supplement: c3ob27500k.pdf [file c3ob27500k.pdf]

## Supplementary data for

# Acridine-based macrocyclic fluorescent sensors: self-assembly behavior characterized by crystal structures and tunable bathochromic-shift in emission induced by $\text{H}_2\text{PO}_4^-$ via adjusting the ring size and rigidity

Dawei Zhang,<sup>a</sup> Xiaozhi Jiang,<sup>a</sup> Haiqiang Yang,<sup>a</sup> Alexandre Martinez,<sup>\*b</sup> Meiyun Feng,<sup>a</sup> Zhiyun Dong<sup>a</sup> and Guohua Gao<sup>\*a</sup>

<sup>a</sup>Shanghai Key Laboratory of Green Chemistry and Chemical Processes, Department of Chemistry, East China Normal University, 3663 North Zhongshan Road, Shanghai, 200062, P. R. China. Tel and Fax: +86(21)62233323, ghgao@chem.ecnu.edu.cn

<sup>b</sup>Laboratoire de Chimie, CNRS, École Normale Supérieure de Lyon, 46, Allée d'Italie, F-69364, Lyon, France. E-mail: alexandre.martinez@ens-lyon.fr

## Graphical abstract

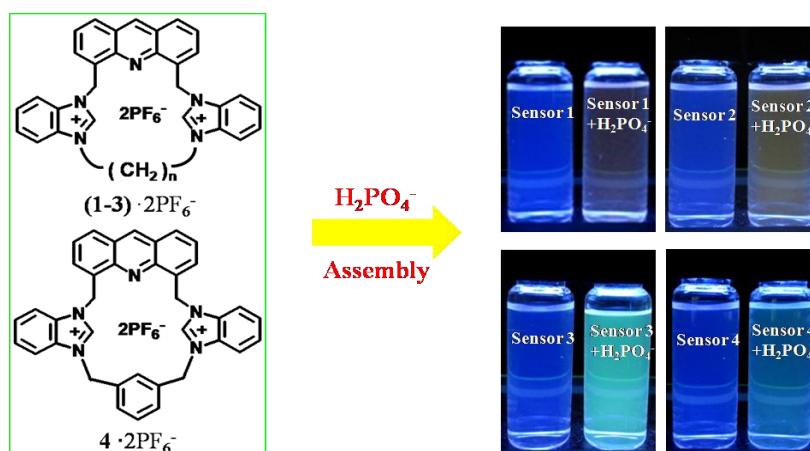

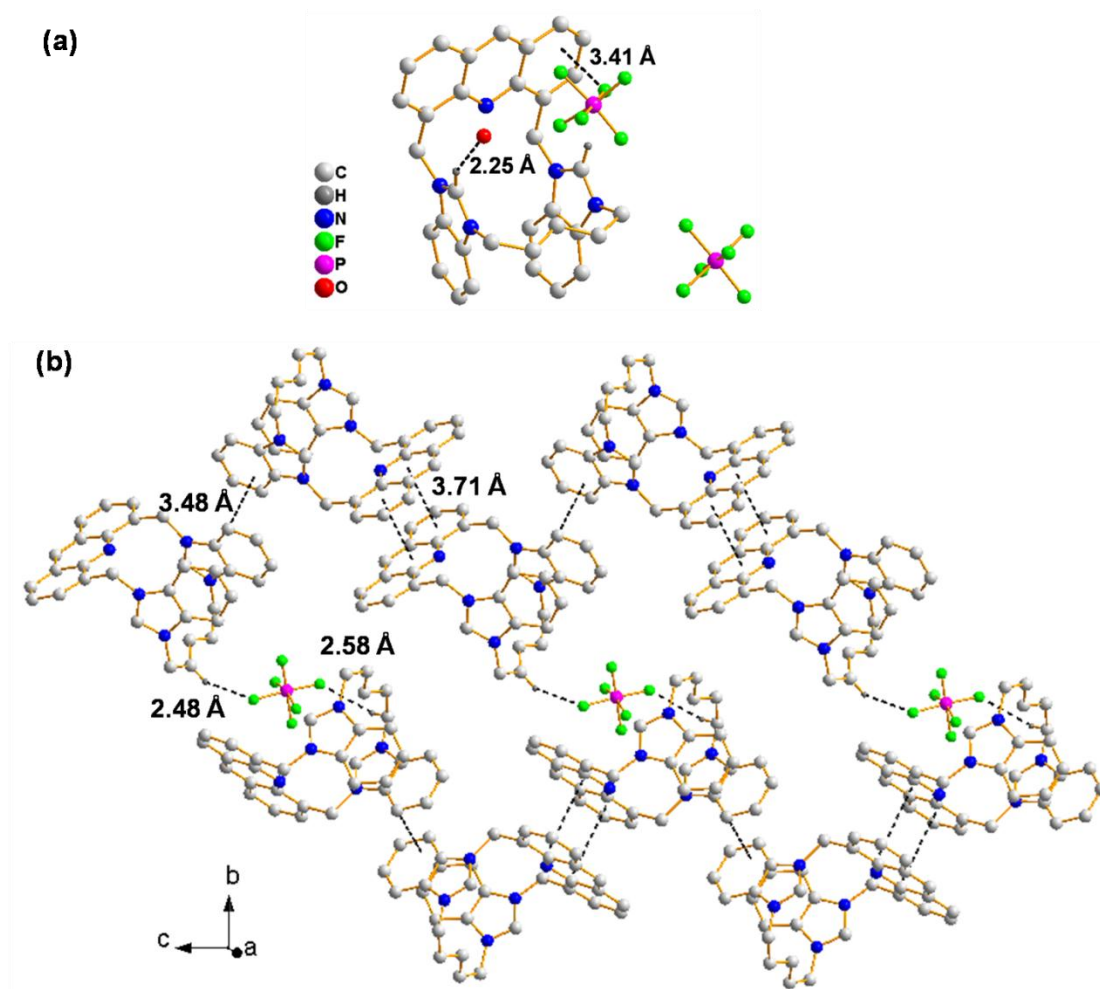

Fig. S1 Crystal structure (a) and the self-assembly network (b) of  $2 \cdot 2(\text{PF}_6^-) \cdot 0.5(\text{H}_2\text{O})$ . Nonacidic hydrogen atoms, some counterions and solvent molecules are omitted for clarity. Dashed lines represent hydrogen bonds, anion- $\pi$  and  $\pi$ - $\pi$  interactions.

The crystal structures of  $2 \cdot 2(\text{PF}_6^-) \cdot 0.5(\text{H}_2\text{O})$  shown in Fig. S1 is similar with that of sensor  $1 \cdot 2(\text{PF}_6^-) \cdot (\text{CH}_3\text{COCH}_3)$ : cave-like conformation of the sensors, hydrogen bonds between a C(2) protons of the benzimidazolium and oxygen atoms (2.25 Å), and anion- $\pi$  interactions between  $[\text{PF}_6]^-$  and acridine ring (3.41 Å). Also, for the packing mode, repetitive structure units of the sawtooth-like column were formed by the two types of  $\pi$ - $\pi$  interactions and were assembled via hydrogen bonds between  $[\text{PF}_6]^-$  and the adjacent two columns. However, for  $2 \cdot 2(\text{PF}_6^-) \cdot 0.5(\text{H}_2\text{O})$ , a C(2) proton of the benzimidazolium did not form the obvious hydrogen bond with  $[\text{PF}_6]^-$ , since the shortest F...H distance is 2.80 Å.

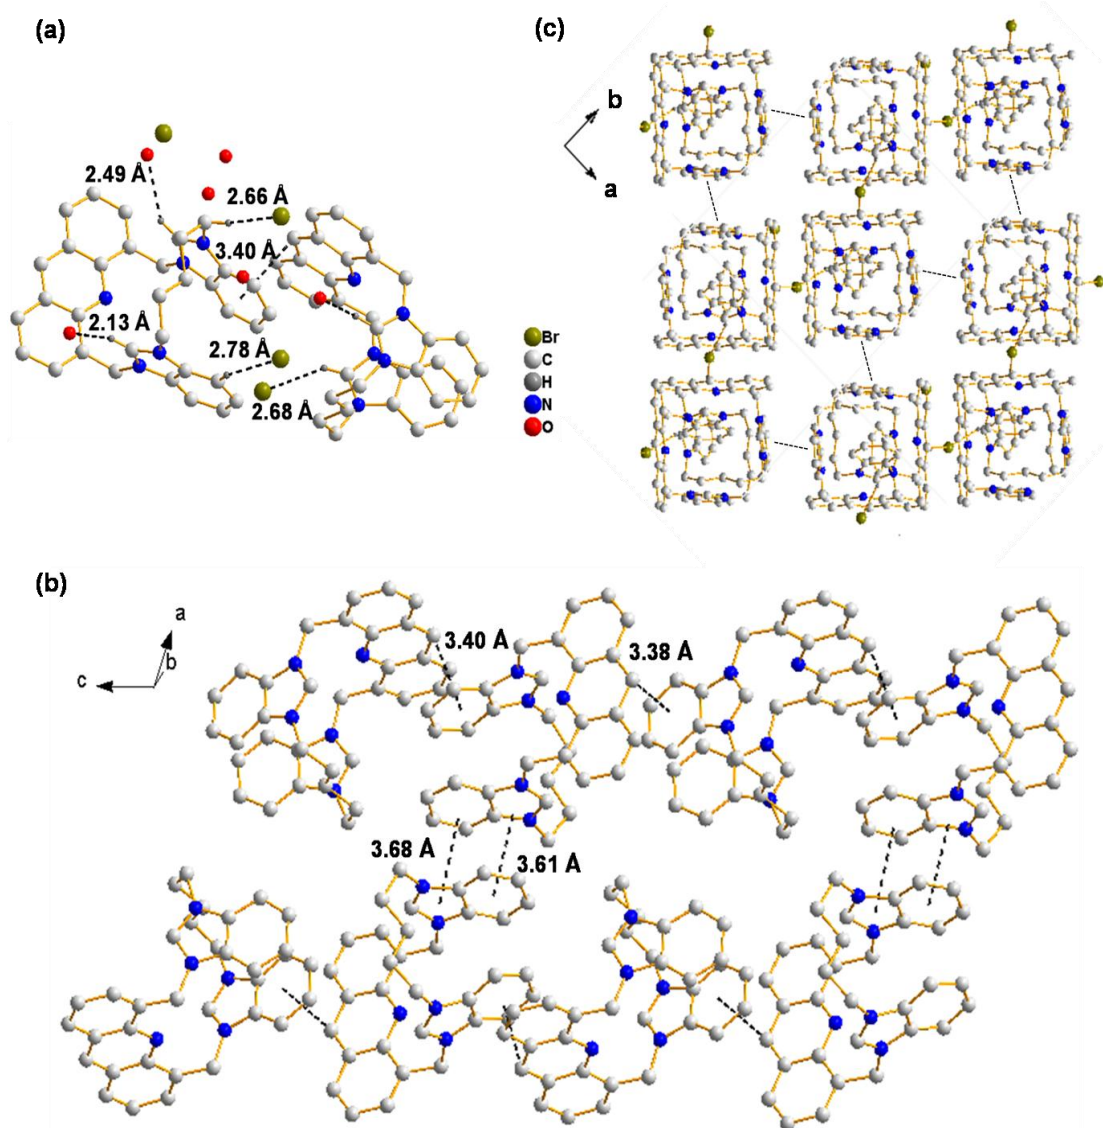

Fig. S2 Crystal structure (a) and the self-assembly network viewing along b (b) and c (c) axes of  $2 \cdot 2(\text{Br}^-) \cdot 3(\text{H}_2\text{O})$ . Nonacidic hydrogen atoms, some counterions and solvent molecules are omitted for clarity. Dashed lines represent hydrogen bonds and  $\pi$ - $\pi$  interactions.

The crystal structure of  $2 \cdot 2(\text{Br}^-) \cdot 3(\text{H}_2\text{O})$  was shown in Fig. S2. Two crystallographically distinct conformations with different intramolecular interactions in one unit cell were adopted. In one conformation, two benzimidazolium sites were fully occupied by  $\text{H}_2\text{O}$  molecules. However, in the other, one site was occupied by a  $\text{H}_2\text{O}$  molecule and the other benzimidazolium site preferred to form hydrogen bond with a bromide. The two conformers were connected to each other via intermolecular  $\pi$ - $\pi$  interaction between an acridine ring and a benzimidazolium, which led to the

formation of an infinite column (Fig. S2b). Fig. S2b and 2c showed two sets of  $2 \cdot 2(\text{Br}^-) \cdot 3(\text{H}_2\text{O})$  arranged in different orientations. The adjacent columns were assembled through  $\pi$ - $\pi$  interactions between two anti benzimidazoliums (3.61-3.68 Å) (Fig. S2b) and hydrogen bonds with bromide (Fig.S2c), giving rise to the formation of a three-dimensional network by self-assembly.

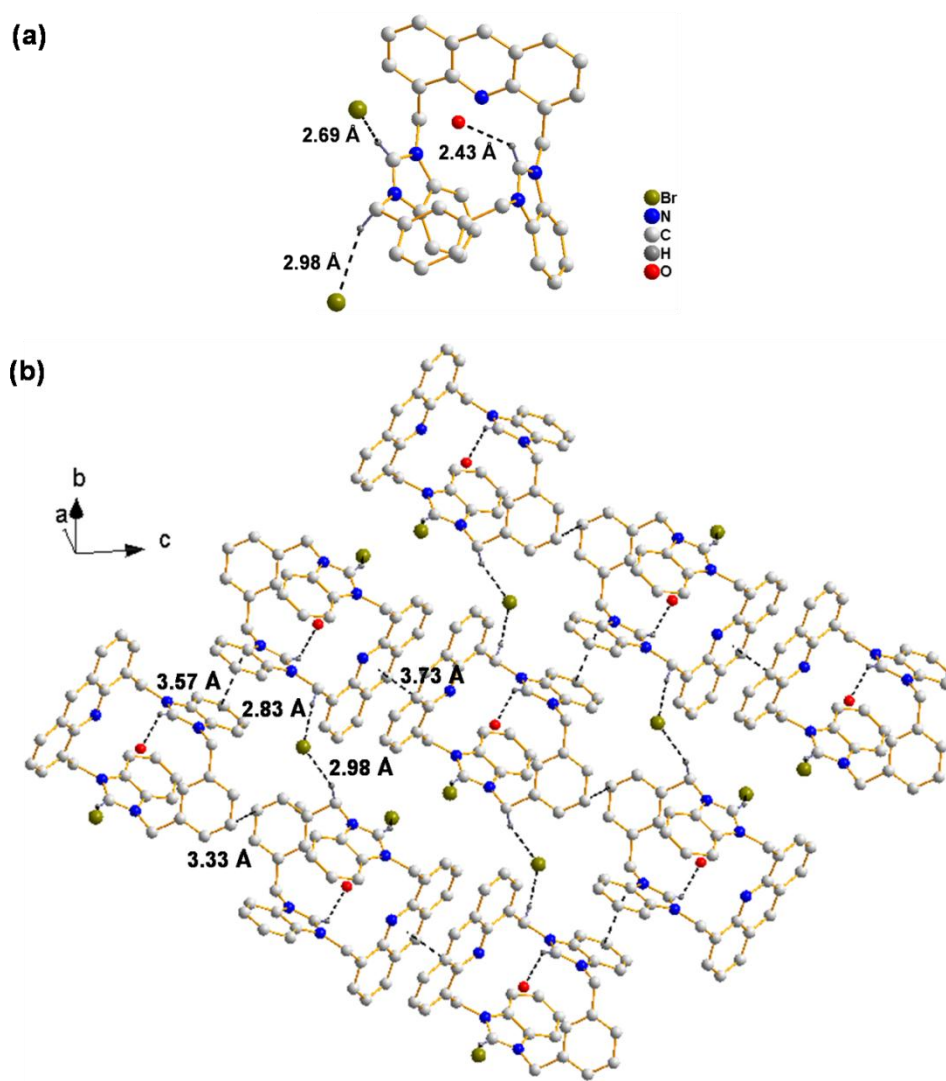

Fig. S3 Crystal structure (a) and the self-assembly network (b) of  $4 \cdot 2(\text{Br}^-) \cdot (\text{H}_2\text{O})$ . Nonacidic hydrogen atoms, some counterions are omitted for clarity. Dashed lines represent hydrogen bonds and  $\pi$ - $\pi$  interactions.

In the crystal structure of  $4 \cdot 2(\text{Br}^-) \cdot (\text{H}_2\text{O})$  shown in Fig. S3a, a cave-like conformation was also observed. The two directional C(2) protons of the benzimidazoliums formed hydrogen bonds with a bromide counteranion (2.69 Å) and

a oxygen atom of H<sub>2</sub>O (2.43 Å) respectively. Another bromide anion formed hydrogen bond with a methylene hydrogen neighboring with benzimidazolium (2.98 Å). A face-to-face  $\pi$ - $\pi$  interaction between two acridine rings (3.73 Å) and a  $\pi$ - $\pi$  interaction between two intermolecular benzenes (3.33 Å) keep the three molecules together to form a repetitive structure unit of a column (Fig. S3b). In addition, the two adjacent units were connected to each other by sharing a common bromide anion forming two hydrogen bonds. The combination of the two hydrogen bonds and a  $\pi$ - $\pi$  interaction between two benzimidazolium in the corresponding two adjacent columns (3.57 Å) led to the formation of a two-dimensional network.

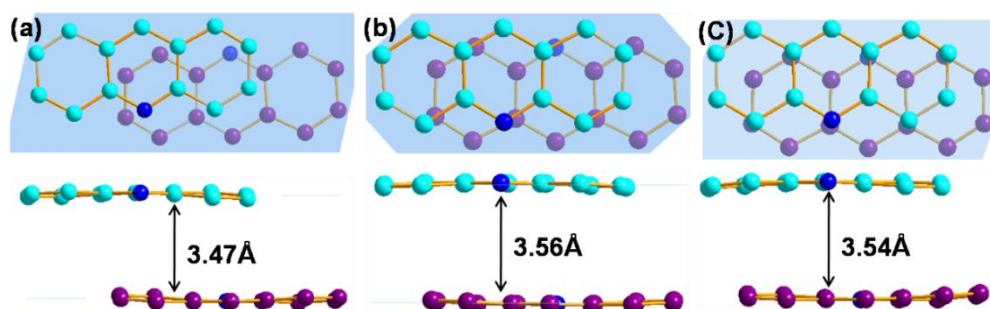

**Fig. S4** Comparison on the extent of  $\pi$ - $\pi$  interactions between two acridine rings of  $1 \cdot 2(\text{PF}_6^-) \cdot (\text{CH}_3\text{COCH}_3)$  (a),  $2 \cdot 2(\text{PF}_6^-) \cdot 0.5(\text{H}_2\text{O})$  (b) and  $4 \cdot 2(\text{Br}^-) \cdot (\text{H}_2\text{O})$  (c). Arrow lines represent the plane-to-plane distances between two acridine rings.



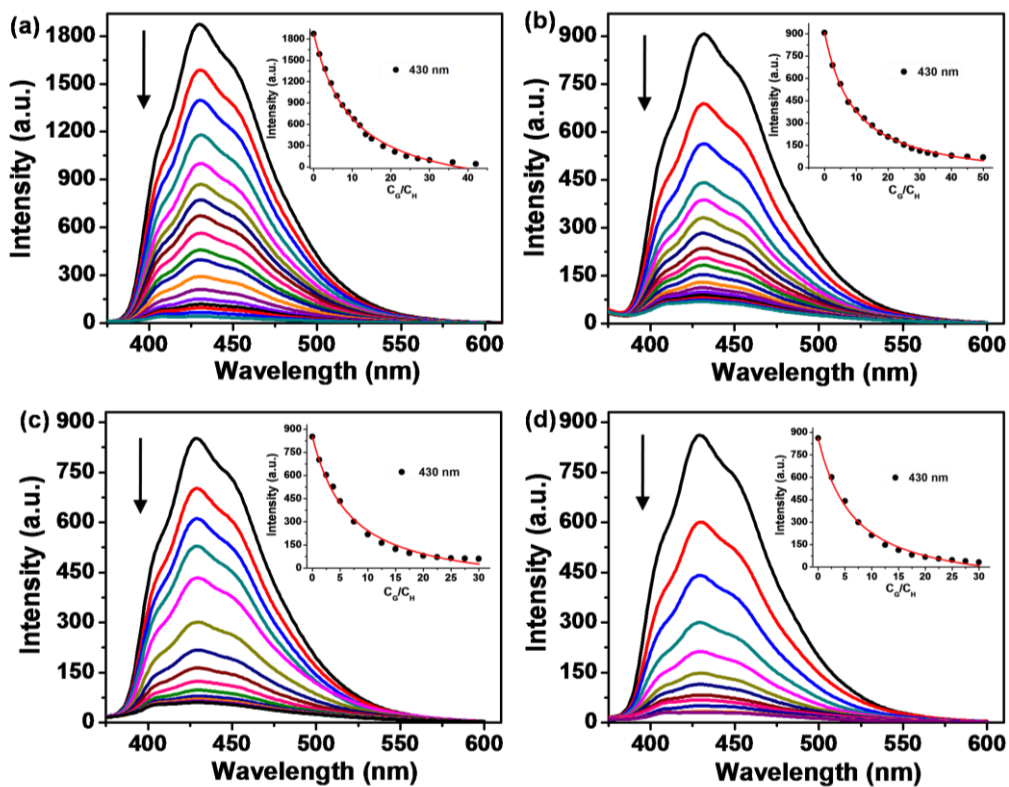

**Fig. S5** Fluorescence titrations of 5  $\mu\text{M}$  sensors **1** excited at 362 nm (a), **2** excited at 363 nm (b), **3** excited at 358 nm (c) and **4** excited at 362 nm (d) with TBAF in  $\text{CH}_3\text{CN}$  (excitation and emission slit :5 nm). Inset: intensity developments at 430 nm as a function of added TBAF equivalents.

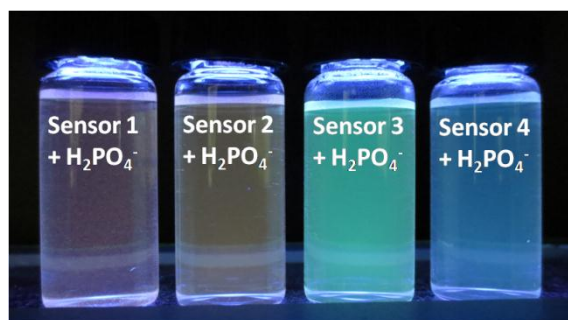

**Fig. S6** Fluorescence colors of sensors **1-4** (5  $\mu\text{M}$ ) after addition of  $\text{TBAH}_2\text{PO}_4$  two months later  
(Excitation wavelength of the UV lamp: 365 nm).

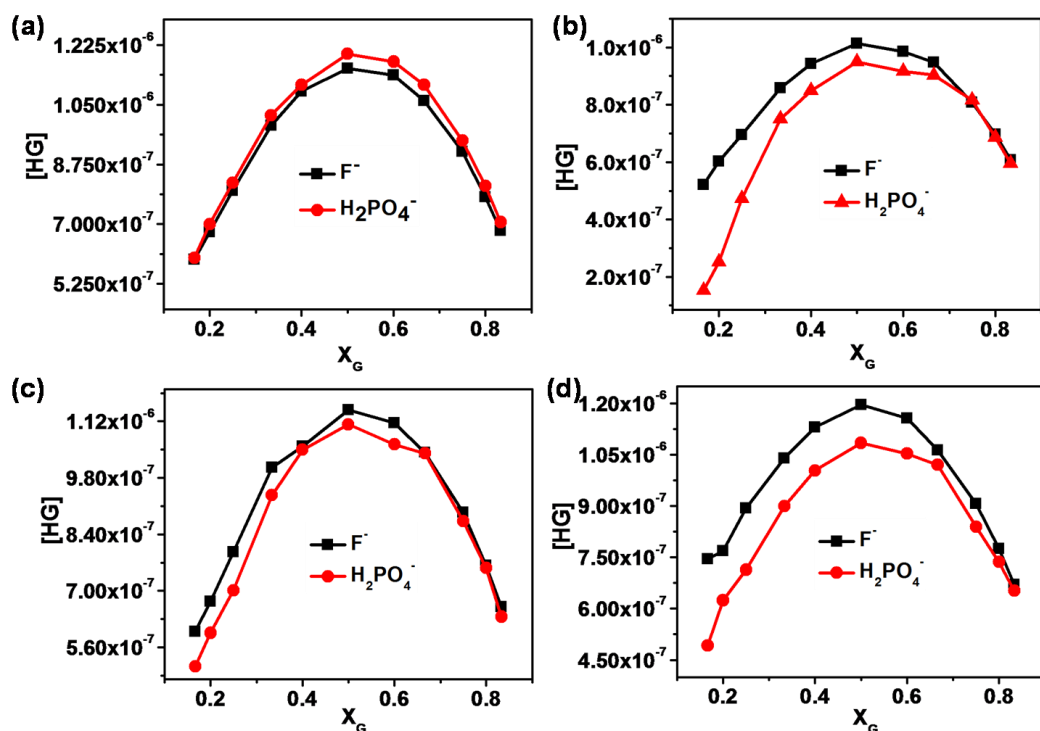

Fig. S7 Fluorescence Job's plots for sensors 1 (a), 2 (b), 3 (c) and 4 (d) with anions.

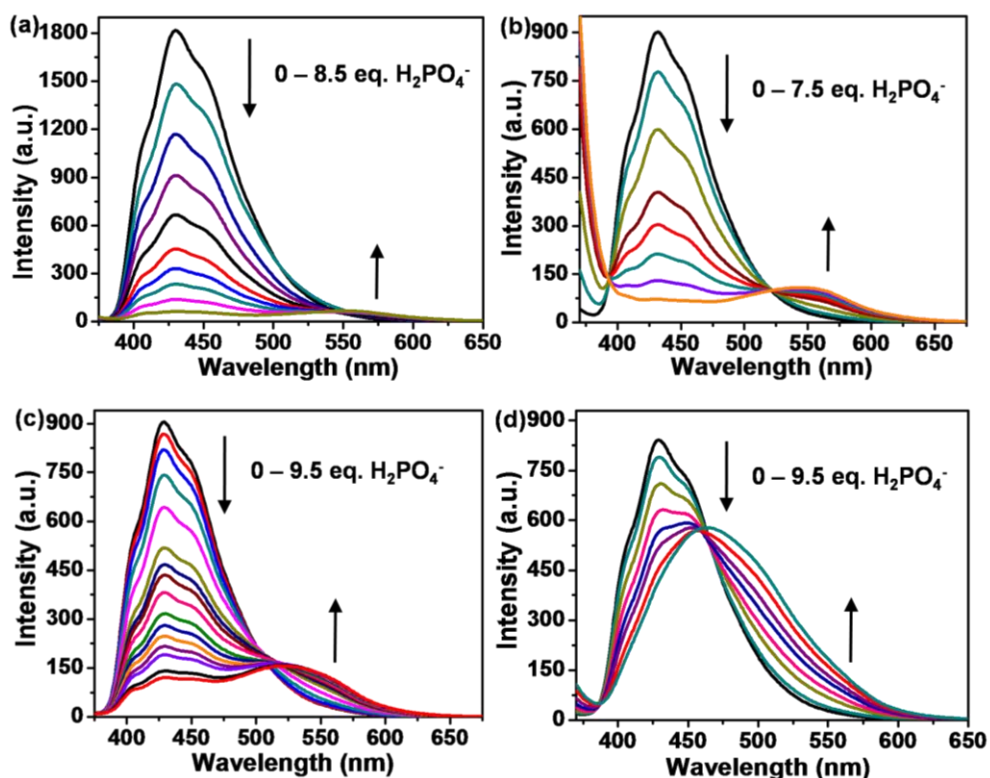

Fig. S8 Fluorescence titrations of 5  $\mu$ M sensors 1 excited at 362 nm (a), 2 excited at 363 nm (b), 3 excited at 358 nm (c) and 4 excited at 362 nm (d) with  $TBAH_2PO_4$  in  $H_2O-CH_3CN$  (1:99, v/v) (excitation and emission slit :5 nm).

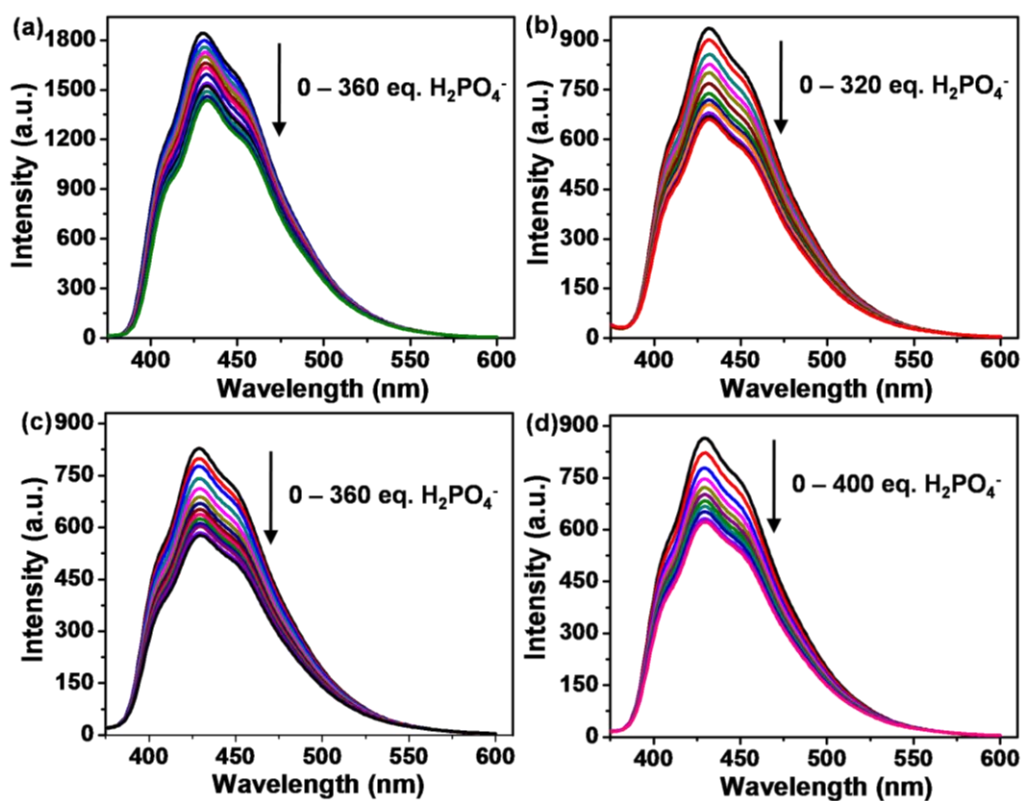

**Fig. S9** Fluorescence titrations of 5  $\mu\text{M}$  sensors **1** excited at 362 nm (a), **2** excited at 363 nm (b), **3** excited at 358 nm (c) and **4** excited at 362 nm (d) with  $\text{TBAH}_2\text{PO}_4$  in  $\text{H}_2\text{O}-\text{CH}_3\text{CN}$  (3:97, v/v) (excitation and emission slit :5 nm).

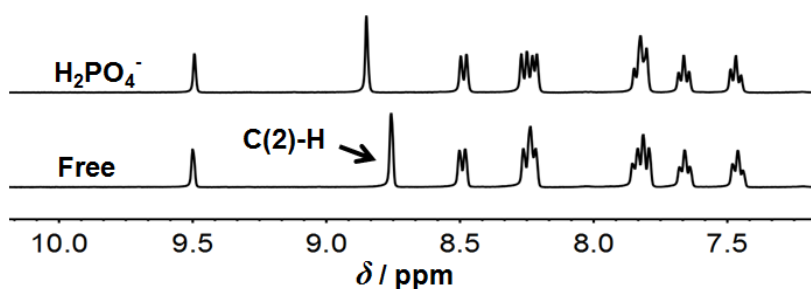

**Fig. S10** Partial  $^1\text{H}$  NMR spectra of sensor **2** (10 mM) in the absence and presence of  $\text{TBAH}_2\text{PO}_4$  (1 equiv.) in  $\text{DMSO}-d_6$ .



**Table S1.** Crystal data and refinement for compounds **1**·2PF<sub>6</sub>, and **2**·2PF<sub>6</sub>.

| Compound                                           | <b>1</b> ·2PF <sub>6</sub>                                                     | <b>2</b> ·2PF <sub>6</sub>                                                      |
|----------------------------------------------------|--------------------------------------------------------------------------------|---------------------------------------------------------------------------------|
| CCDC                                               | 914120                                                                         | 914121                                                                          |
| Empirical formula                                  | C <sub>36</sub> H <sub>35</sub> F <sub>12</sub> N <sub>5</sub> OP <sub>2</sub> | C <sub>68</sub> H <sub>56</sub> F <sub>24</sub> N <sub>10</sub> OP <sub>4</sub> |
| <i>M<sub>r</sub></i>                               | 843.63                                                                         | 1609.11                                                                         |
| Temperature (K)                                    | 296(2)                                                                         | 296(2)                                                                          |
| Crystal system                                     | Triclinic                                                                      | Monoclinic                                                                      |
| Space group                                        | <i>P</i> $\bar{1}$                                                             | <i>P</i> 2(1)/n                                                                 |
| <i>a</i> /Å                                        | 10.958(13)                                                                     | 9.6585(4)                                                                       |
| <i>b</i> /Å                                        | 11.539(13)                                                                     | 25.7091(12)                                                                     |
| <i>c</i> /Å                                        | 16.667(19)                                                                     | 14.0835(7)                                                                      |
| $\alpha$ /°                                        | 75.826(13)                                                                     | 90                                                                              |
| $\beta$ /°                                         | 82.501(13)                                                                     | 92.542(2)                                                                       |
| $\gamma$ /°                                        | 65.070(12)                                                                     | 90                                                                              |
| <i>V</i> /Å <sup>3</sup>                           | 1852(4)                                                                        | 3493.7(3)                                                                       |
| <i>Z</i>                                           | 2                                                                              | 2                                                                               |
| Crystal size (mm <sup>3</sup> )                    | 0.10 × 0.07 × 0.03                                                             | 0.10 × 0.07 × 0.03                                                              |
| <i>D<sub>c</sub></i> /g cm <sup>-3</sup>           | 1.513                                                                          | 1.530                                                                           |
| $\mu$ /mm <sup>-1</sup>                            | 0.216                                                                          | 0.224                                                                           |
| <i>F</i> (000)                                     | 864                                                                            | 1636                                                                            |
| $\theta$ range (°)                                 | 1.99 - 26.01                                                                   | 1.58 - 28.33                                                                    |
| Reflections collected                              | 10277                                                                          | 47852                                                                           |
| Unique reflections                                 | 7067                                                                           | 8538                                                                            |
| GOF on <i>F</i> <sup>2</sup>                       | 1.034                                                                          | 1.104                                                                           |
| <i>R</i> <sub>(int)</sub>                          | 0.0173                                                                         | 0.0917                                                                          |
| <i>R</i> <sub>1</sub> [ <i>I</i> > 2σ( <i>I</i> )] | 0.0744                                                                         | 0.0815                                                                          |
| w <i>R</i> <sub>2</sub> (all data)                 | 0.2335                                                                         | 0.2533                                                                          |

**Table S2.** Crystal data and refinement for compounds **2·2Br** and **4·2Br**.

| Compound                                           | <b>2·2Br</b>                                                                  | <b>4·2Br</b>                                                                    |
|----------------------------------------------------|-------------------------------------------------------------------------------|---------------------------------------------------------------------------------|
| CCDC                                               | 914123                                                                        | 914124                                                                          |
| Empirical formula                                  | C <sub>34</sub> H <sub>31</sub> Br <sub>2</sub> N <sub>5</sub> O <sub>3</sub> | C <sub>37</sub> H <sub>29</sub> Br <sub>2</sub> N <sub>5</sub> O <sub>0.5</sub> |
| <i>M</i> <sub>r</sub>                              | 717.46                                                                        | 711.47                                                                          |
| Temperature (K)                                    | 173(2)                                                                        | 296(2)                                                                          |
| Crystal system                                     | Monoclinic                                                                    | Triclinic                                                                       |
| Space group                                        | <i>P</i> 2(1)                                                                 | <i>P</i> $\bar{1}$                                                              |
| <i>a</i> /Å                                        | 14.481(3)                                                                     | 8.8544(15)                                                                      |
| <i>b</i> /Å                                        | 13.824(3)                                                                     | 11.0995(19)                                                                     |
| <i>c</i> /Å                                        | 16.878(3)                                                                     | 16.475(3)                                                                       |
| $\alpha$ /°                                        | 90                                                                            | 91.233(2)                                                                       |
| $\beta$ /°                                         | 109.685(3)                                                                    | 90.453(2)                                                                       |
| $\gamma$ /°                                        | 90                                                                            | 105.781(2)                                                                      |
| <i>V</i> /Å <sup>3</sup>                           | 3181.2(11)                                                                    | 1557.6(5)                                                                       |
| <i>Z</i>                                           | 4                                                                             | 2                                                                               |
| Crystal size (mm <sup>3</sup> )                    | 0.65 × 0.65 × 0.25                                                            | 0.170 × 0.110 × 0.040                                                           |
| <i>D</i> <sub>c</sub> /g cm <sup>-3</sup>          | 1.498                                                                         | 1.517                                                                           |
| $\mu$ /mm <sup>-1</sup>                            | 2.591                                                                         | 2.640                                                                           |
| <i>F</i> (000)                                     | 1456                                                                          | 720                                                                             |
| $\theta$ range (°)                                 | 1.28 - 27.60                                                                  | 2.25 - 27.55                                                                    |
| Reflections collected                              | 22227                                                                         | 9828                                                                            |
| Unique reflections                                 | 13934                                                                         | 6931                                                                            |
| GOF on <i>F</i> <sup>2</sup>                       | 1.030                                                                         | 1.082                                                                           |
| <i>R</i> <sub>(int)</sub>                          | 0.0562                                                                        | 0.0266                                                                          |
| <i>R</i> <sub>1</sub> [ <i>I</i> > 2σ( <i>I</i> )] | 0.0641                                                                        | <i>R</i> <sub>1</sub> = 0.0630                                                  |
| <i>wR</i> <sub>2</sub> (all data)                  | 0.1815                                                                        | 0.2112                                                                          |

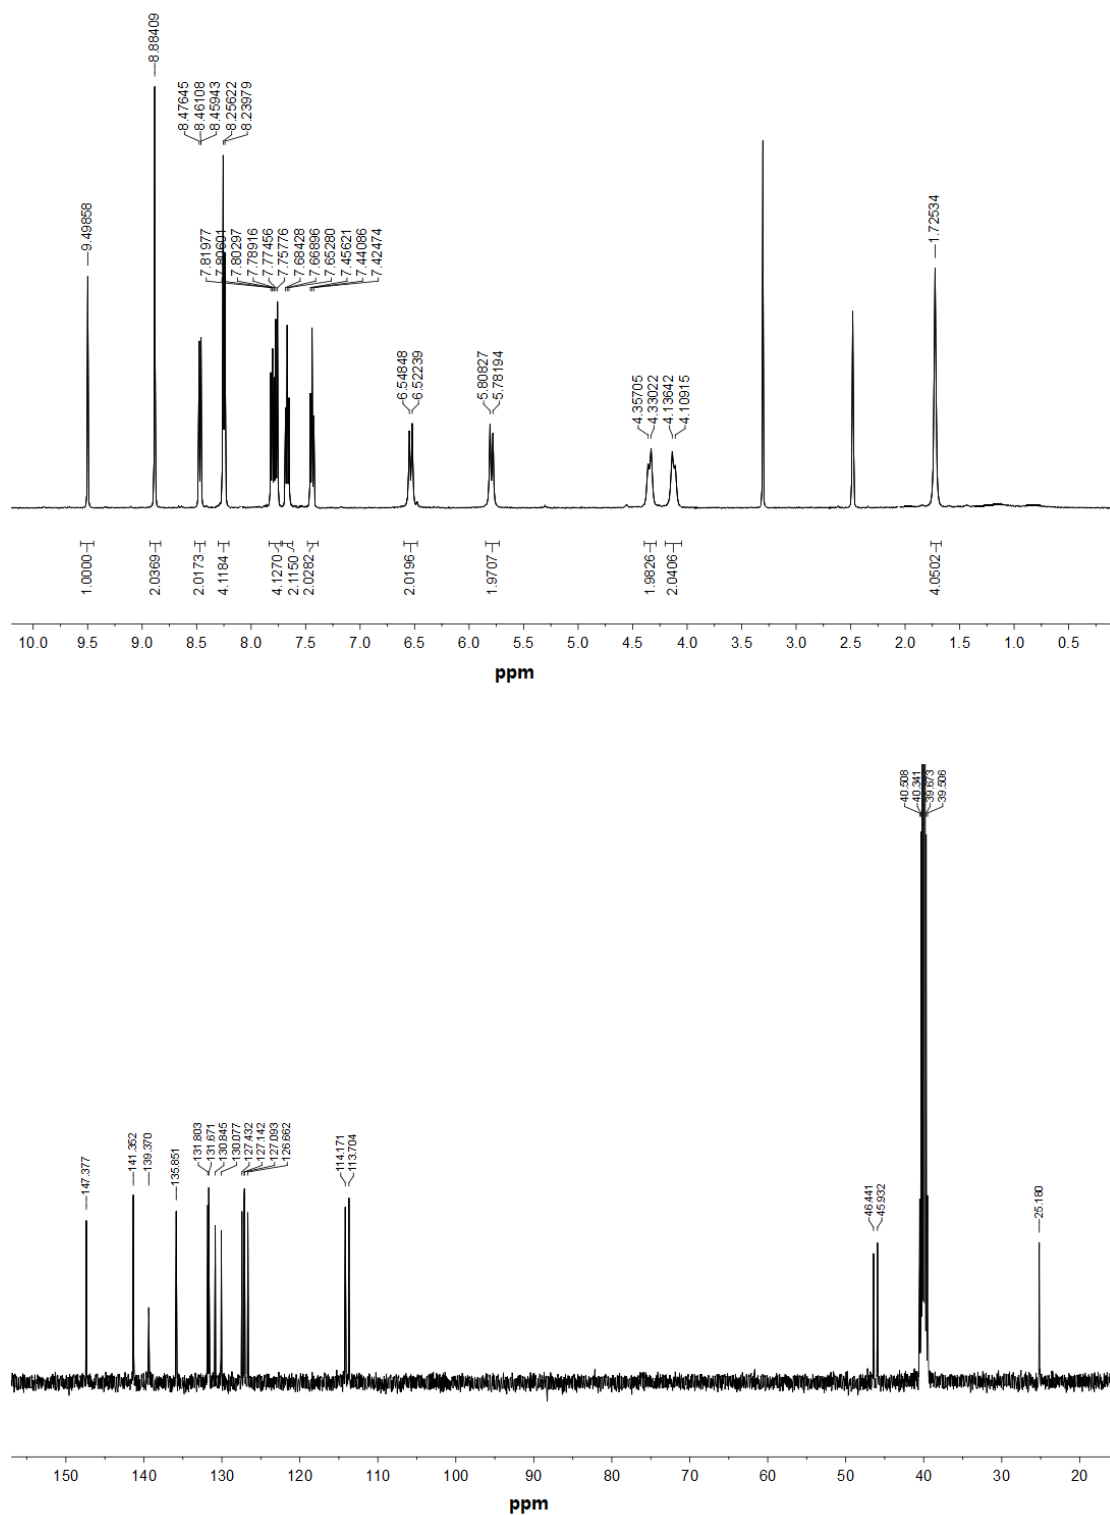

Fig. S11 <sup>1</sup>H NMR (top) and <sup>13</sup>C NMR (bottom) of sensor 1 in DMSO-d<sub>6</sub>.

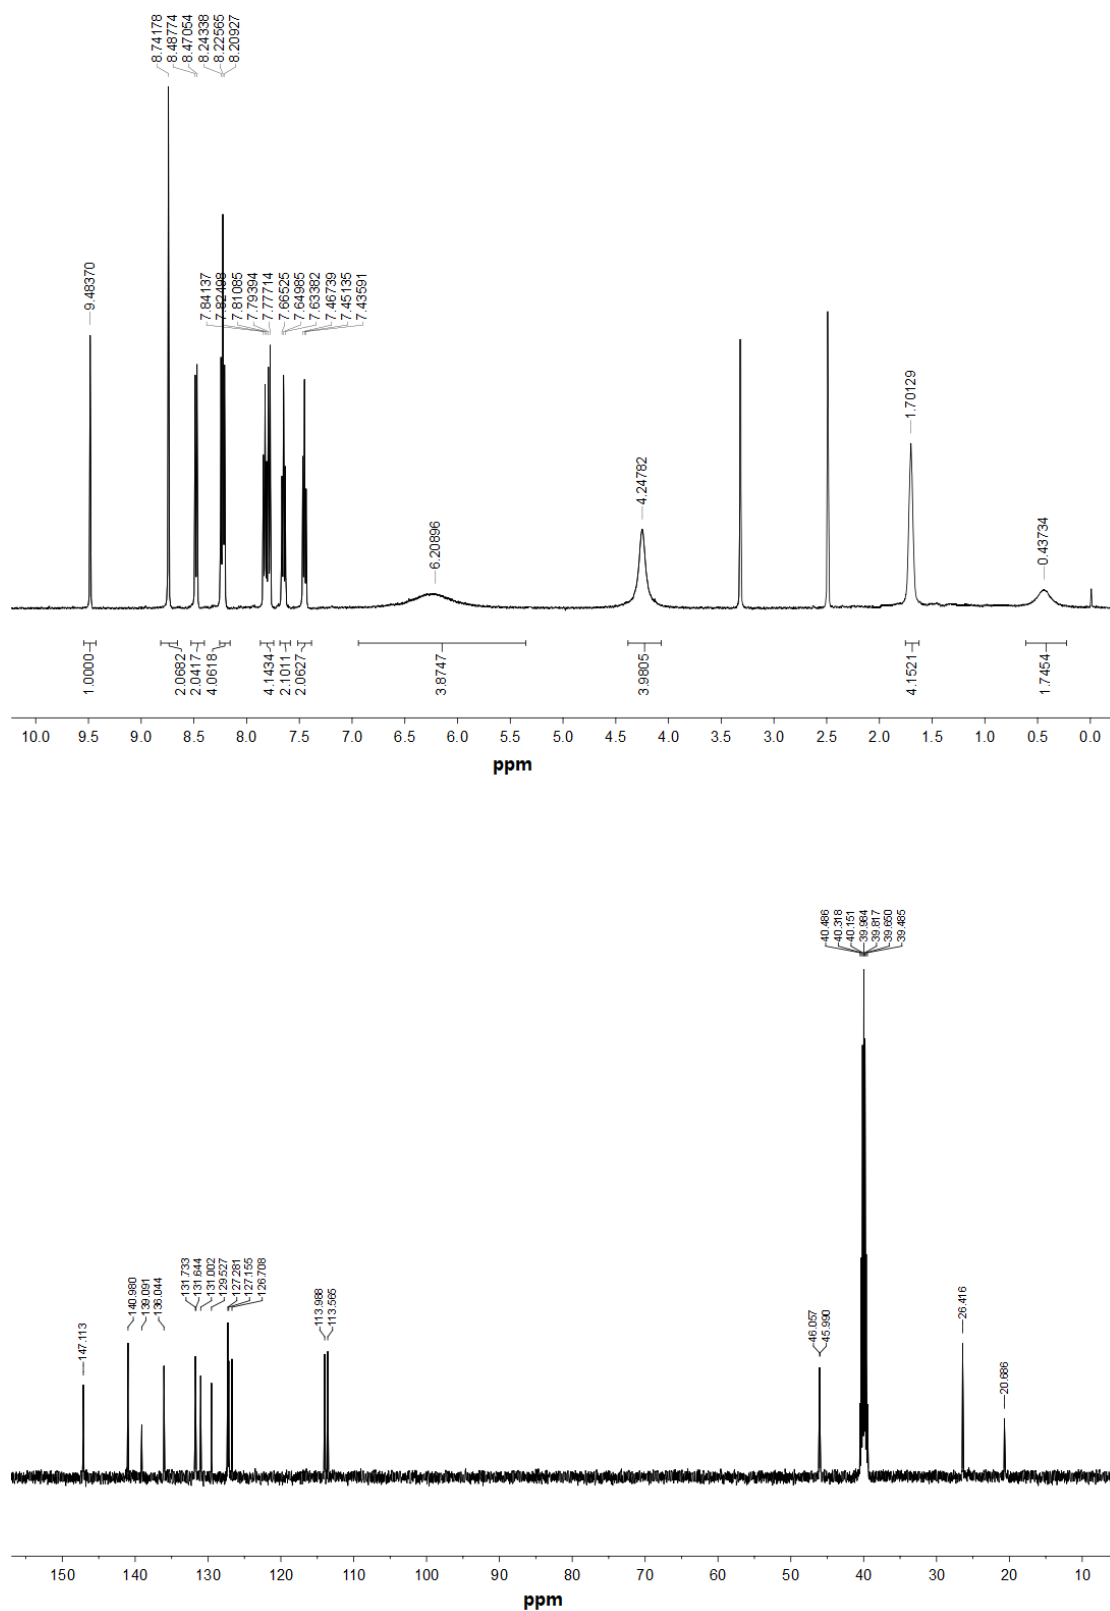

Fig. S12 <sup>1</sup>H NMR (top) and <sup>13</sup>C NMR (bottom) of sensor 2 in DMSO-*d*<sub>6</sub>.

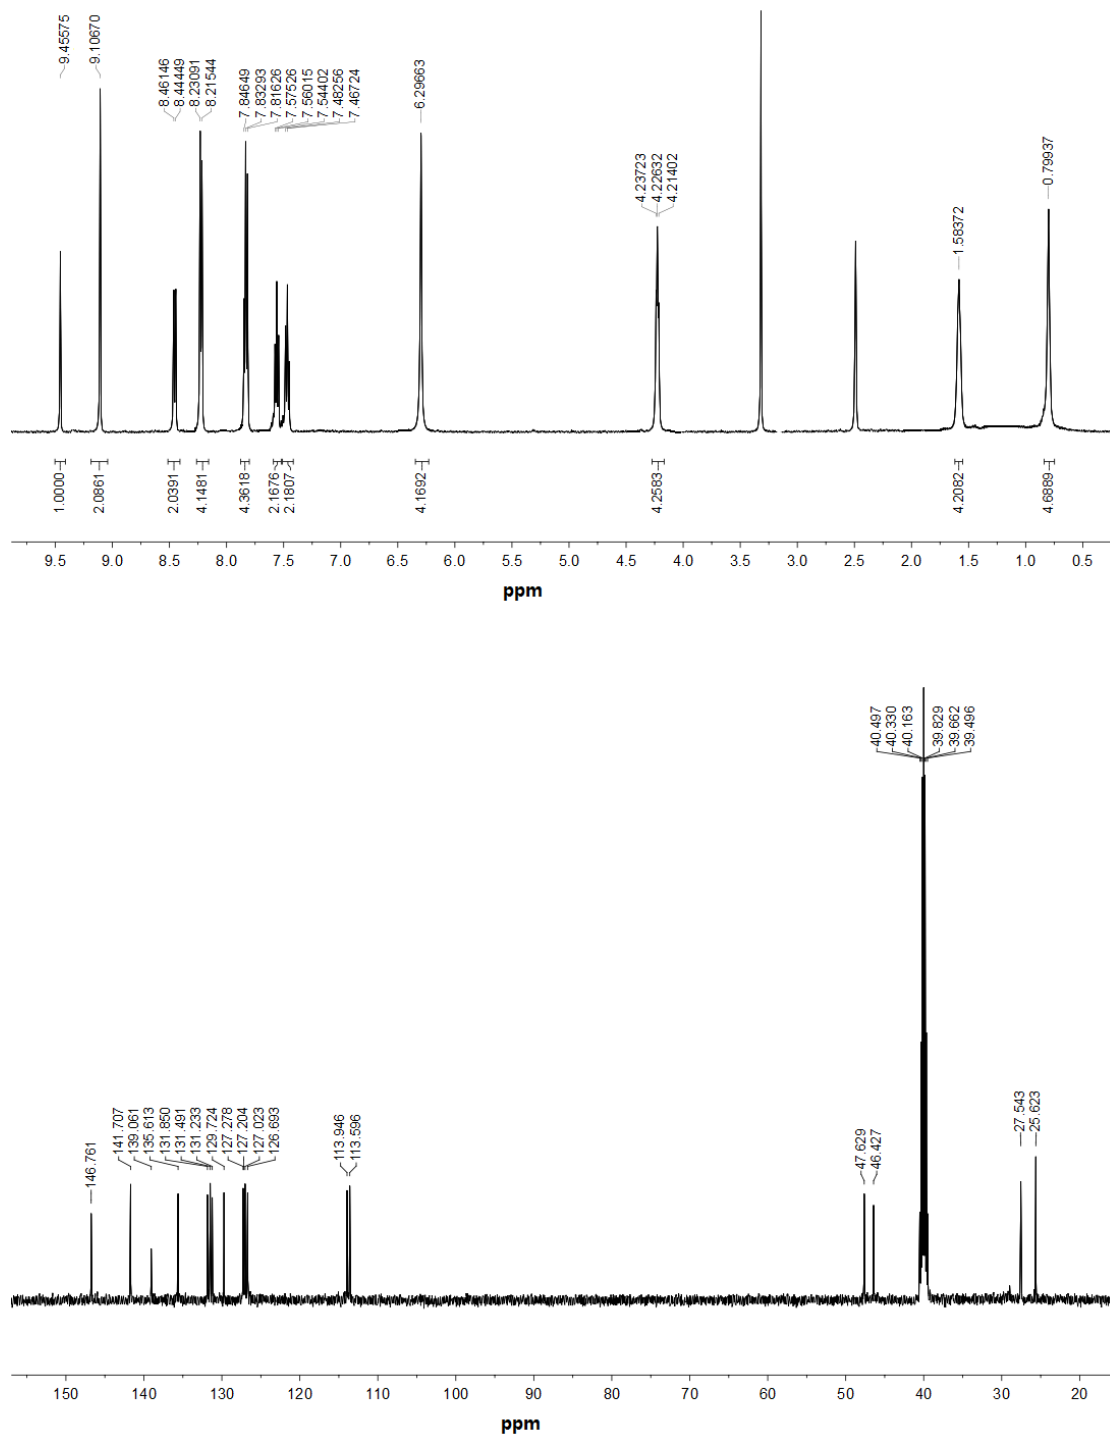

**Fig. S13** <sup>1</sup>H NMR (top) and <sup>13</sup>C NMR (bottom) of sensor **3** in DMSO-*d*<sub>6</sub>.



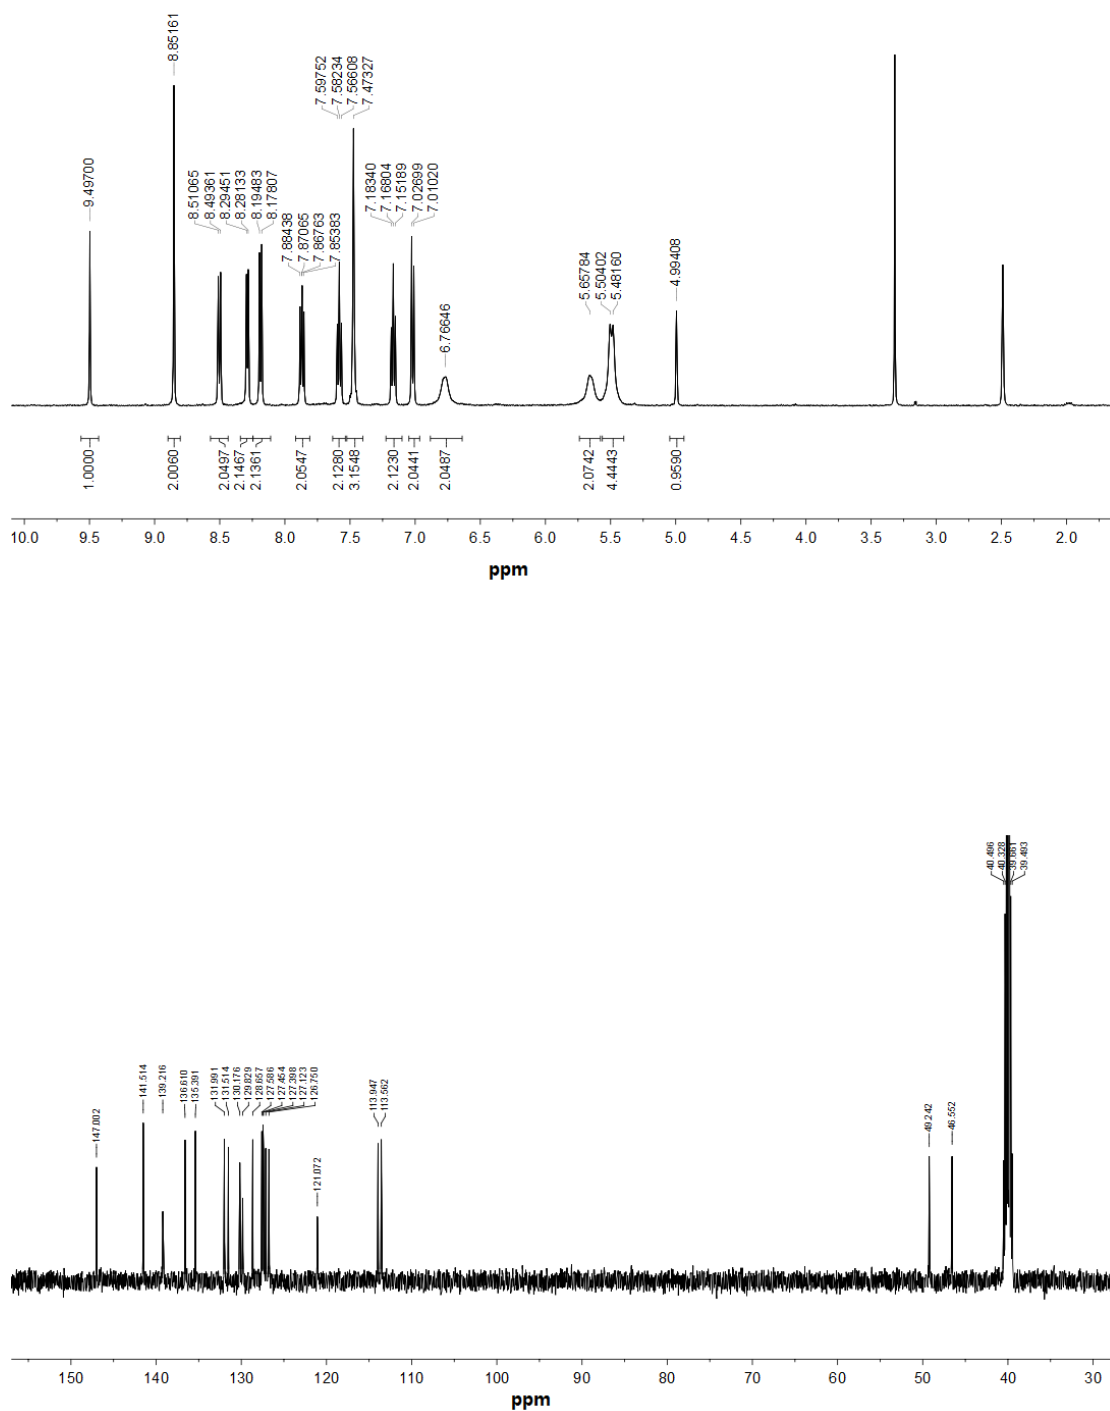

Fig. S14 <sup>1</sup>H NMR (top) and <sup>13</sup>C NMR (bottom) of sensor 4 in DMSO-*d*<sub>6</sub>.
